# Supplementary material for: Synthesis and Structural Characterization of a Series of One-Dimensional Heteronuclear Dirhodium-Silver Coordination Polymers
Source: MDPI journal article supplement (doi:10.3390/polym11010111), 2019-01-10
Supplement: s1 [file s1]

# Synthesis and Structural Characterization of a Series of One-dimensional Heteronuclear Dirhodium-Silver Coordination Polymers

Paula Cruz<sup>‡1</sup>, Estefania Fernandez-Bartolomé<sup>‡1</sup>, Miguel Cortijo<sup>\*1</sup>, Patricia Delgado-Martínez<sup>2</sup>, Rodrigo González-Prieto<sup>1</sup>, José L. Priego,<sup>\*1</sup> M. Rosario Torres<sup>2</sup>, and Reyes Jiménez-Aparicio<sup>\*1</sup>

<sup>1</sup> Departamento de Química Inorgánica, Facultad de Ciencias Químicas, Universidad Complutense de Madrid, Ciudad Universitaria, E-28040 Madrid, Spain.

<sup>2</sup> Centro de Asistencia a la Investigación Difracción de Rayos X, Facultad de Ciencias Químicas, Universidad Complutense de Madrid, E-28040 Madrid, Spain.

\* Correspondence: [miguelcortijomontes@ucm.es](mailto:miguelcortijomontes@ucm.es) (M.C); [bermejo@quim.ucm.es](mailto:bermejo@quim.ucm.es) (J.L.P.); [reyesja@quim.ucm.es](mailto:reyesja@quim.ucm.es) (R.J.-A.).

‡ Both authors contributed equally to this work.

## TABLE OF CONTENTS

|                                                                                                                                                                            |    |
|----------------------------------------------------------------------------------------------------------------------------------------------------------------------------|----|
| Figure S1. Intermolecular interactions found in the structure of <b>1b</b>                                                                                                 | 2  |
| Figure S2. View of the chains that form <b>3b</b> along the <i>c</i> axis in a 2x2x2 cell packing                                                                          | 2  |
| Figure S3. Representation of the structure of <b>3a</b> along the <i>a</i> axis in a 2x2x2 cell packing                                                                    | 3  |
| Figure S4. Representation of the structure of <b>3b</b> along the <i>c</i> axis in a 2x2x2 cell packing                                                                    | 3  |
| Figure S5. View of the chains that form <b>4</b> along the direction of the Rh-Rh bond                                                                                     | 4  |
| Figure S6. View of the chains that form <b>5</b> along the direction of the Rh-Rh bond                                                                                     | 4  |
| Figure S7. Representation of the structure of <b>4</b> along the <i>a</i> axis                                                                                             | 5  |
| Figure S8. Representation of the structure of <b>5</b> along the <i>a</i> axis                                                                                             | 5  |
| Figure S9. Interactions found between the closest (PPh <sub>4</sub> ) <sup>+</sup> cations in the structure of <b>3a</b>                                                   | 6  |
| Figure S10. Interactions found between the closest (PPh <sub>4</sub> ) <sup>+</sup> cations in the structure of <b>3b</b>                                                  | 7  |
| Figure S11. Closest (PPh <sub>4</sub> ) <sup>+</sup> cations in the structure of <b>4</b>                                                                                  | 8  |
| Figure S12. Interactions found between the closest (PPh <sub>4</sub> ) <sup>+</sup> cations in the structure of <b>5</b>                                                   | 9  |
| Figure S13. Representation of the structure of <b>6</b> along the <i>c</i> axis and view of the interactions between the closest (PPh <sub>4</sub> ) <sup>+</sup> cations. | 10 |
| Figure S14. Interactions found between the closest cations and anionic chains in the structure of <b>4</b>                                                                 | 11 |

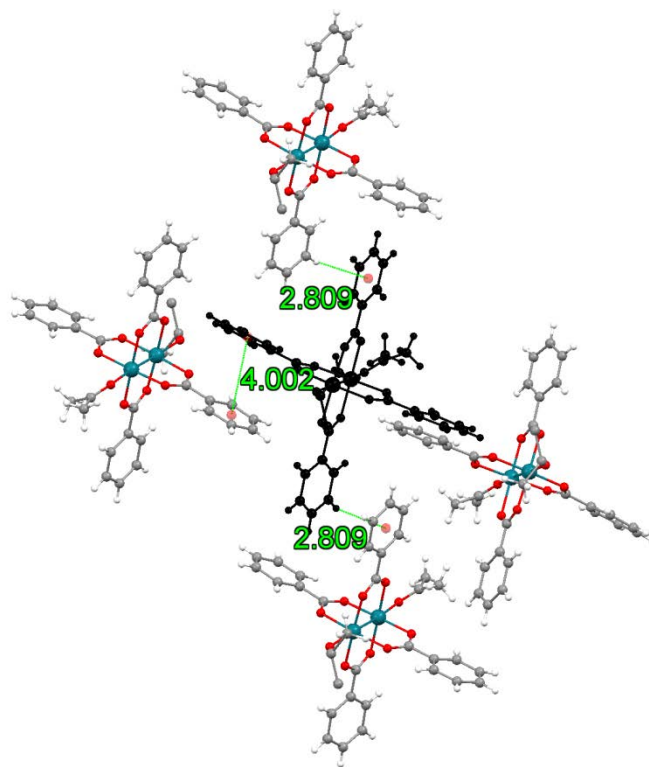

**Figure S1.** Intermolecular interactions found in the structure of **1b**. Thermal ellipsoids are omitted for clarity.

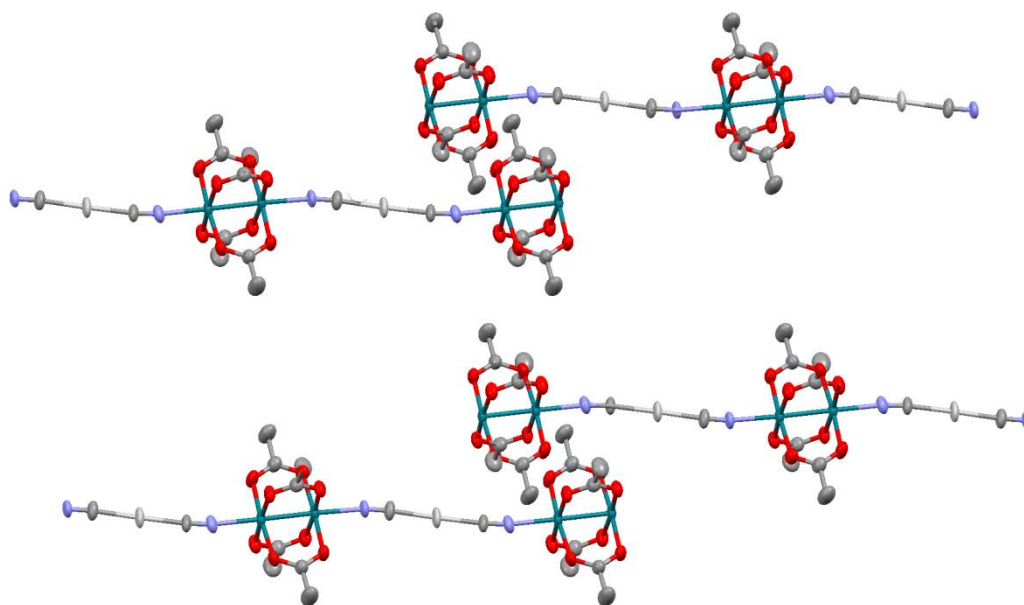

**Figure S2.** View of the chains that form **3b** along the *c* axis.

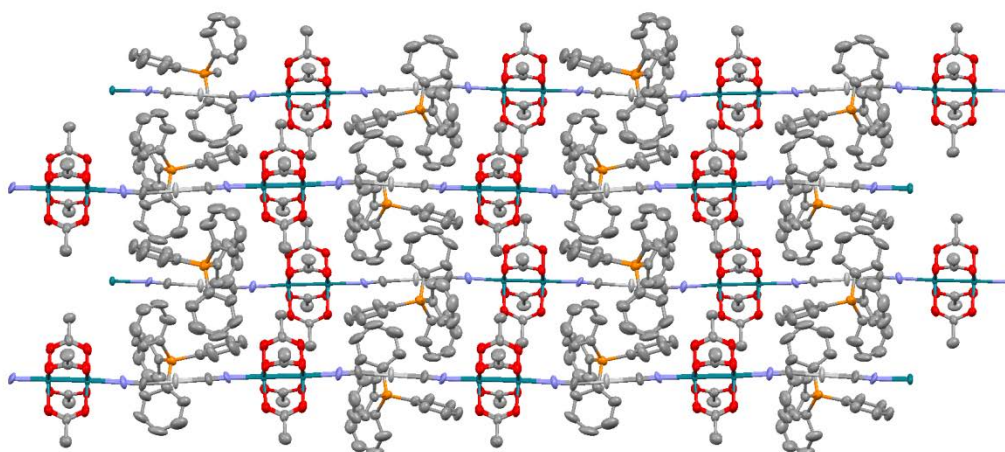

**Figure S3.** Representation of the structure of **3a** along the *a* axis.

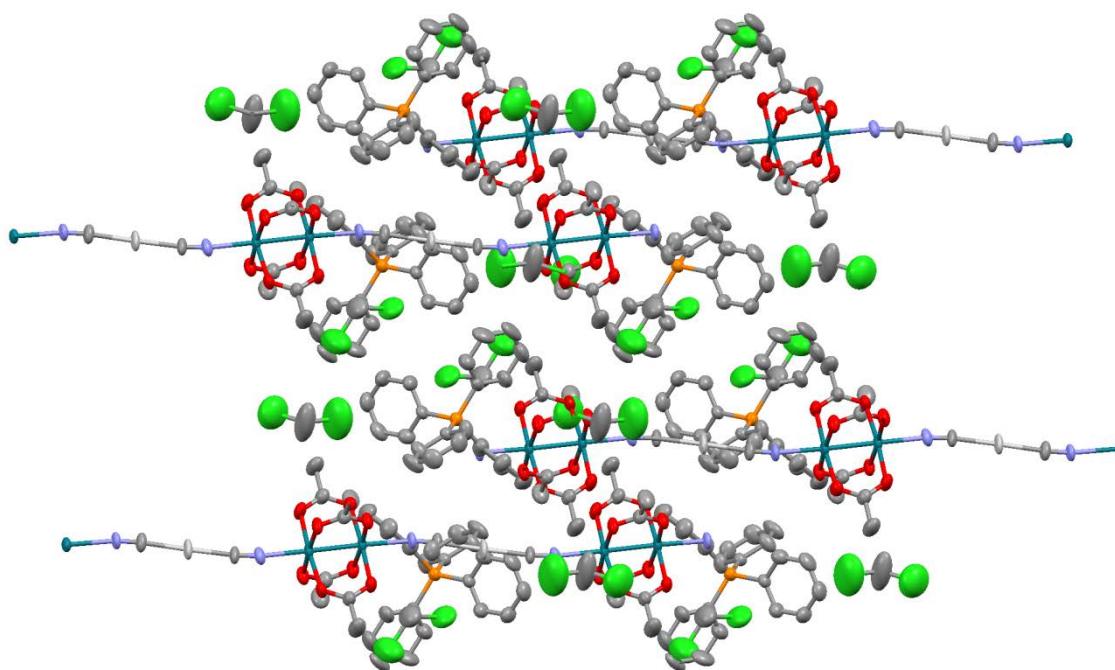

**Figure S4.** Representation of the structure of **3b** along the *c* axis.

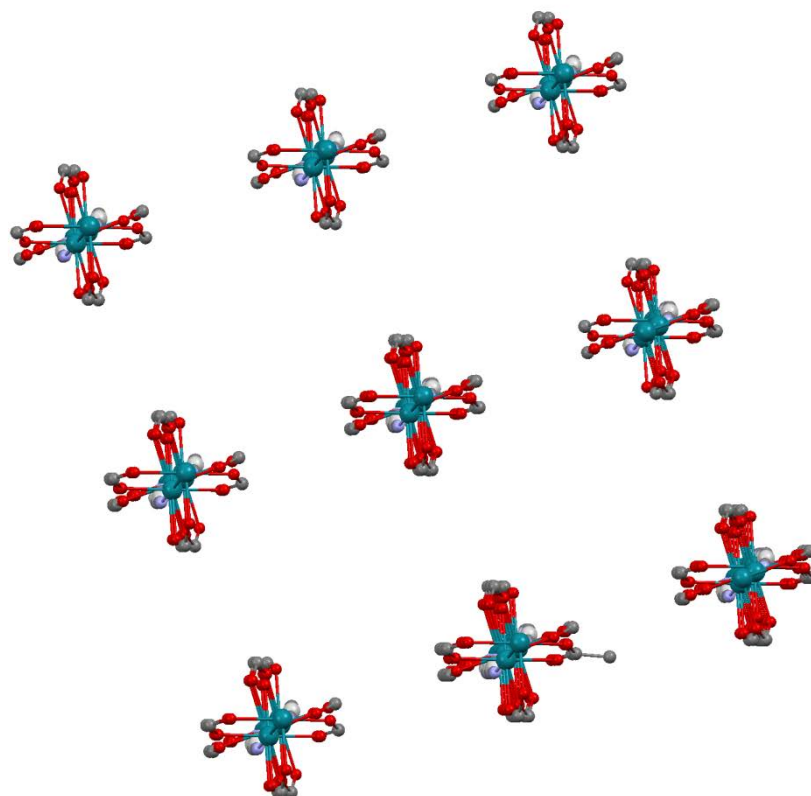

**Figure S5.** View of the chains that form **4** along the direction of the Rh-Rh bond. The substituent of the carboxylate groups have been omitted for clarity.

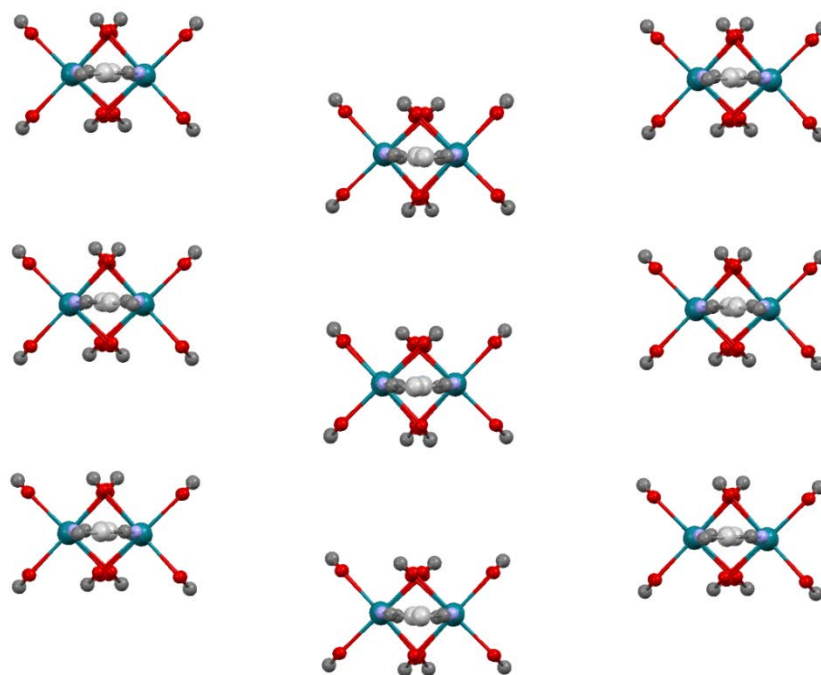

**Figure S6.** View of the chains that form **5** along the direction of the Rh-Rh bond. The substituent of the carboxylate groups have been omitted for clarity.

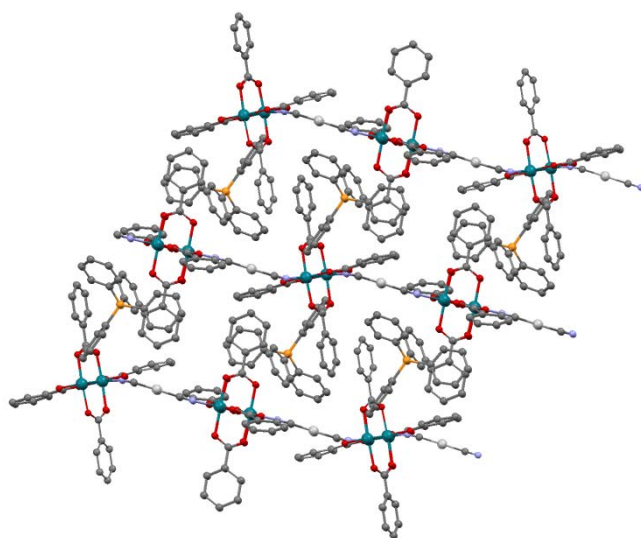

**Figure S7.** Representation of the structure of **4** along the *a* axis. Thermal ellipsoids are omitted for clarity.

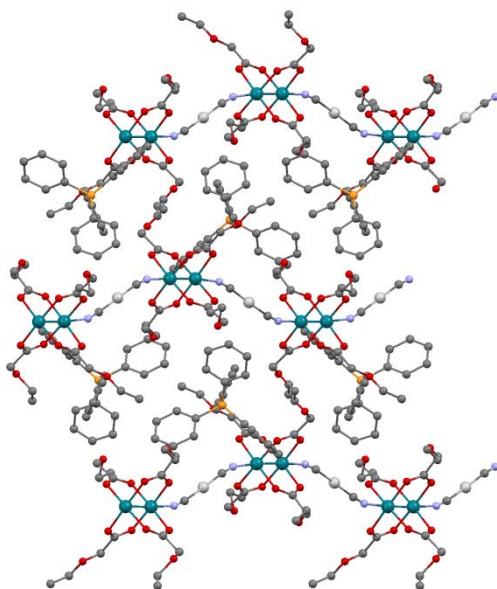

**Figure S8.** Representation of the structure of **5** along the *a* axis. Thermal ellipsoids are omitted for clarity.

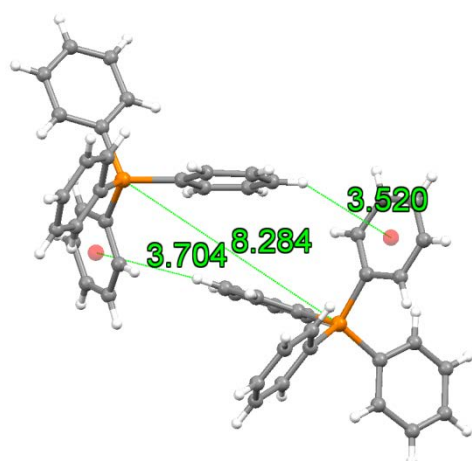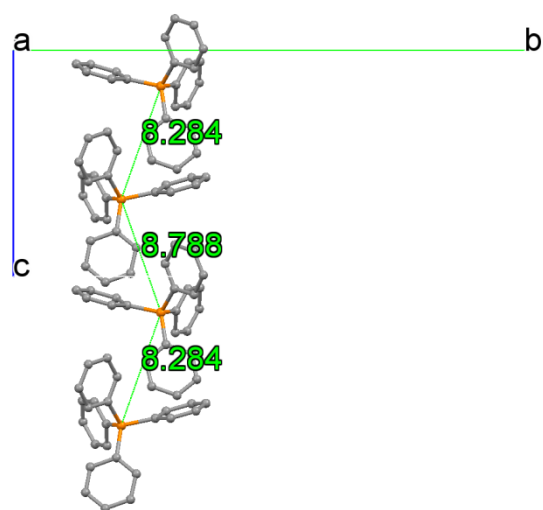

**Figure S9.** Interactions found between the closest  $(\text{PPh}_4)^+$  cations in the structure of of **3a**.

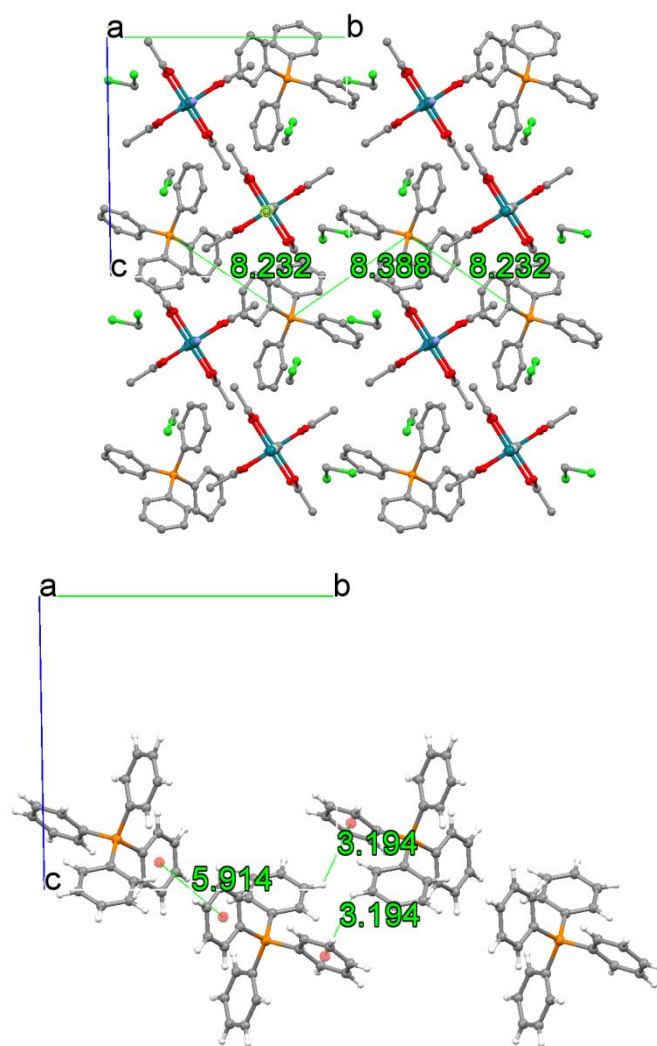

**Figure S10.** Interactions found between the closest  $(\text{PPh}_4)^+$  cations in the structure of of **3b**.

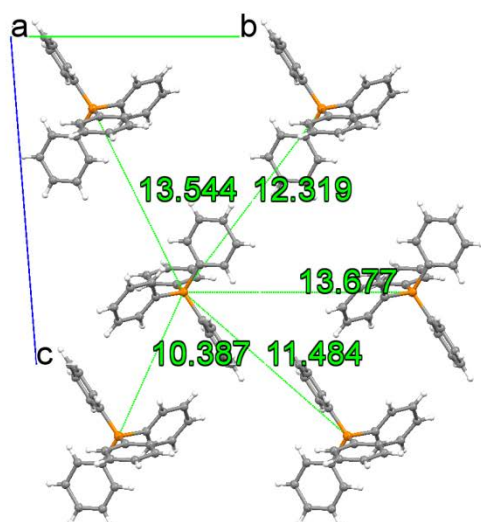

**Figure S11.** Closest  $(\text{PPh}_4)^+$  cations in the structure of **4**



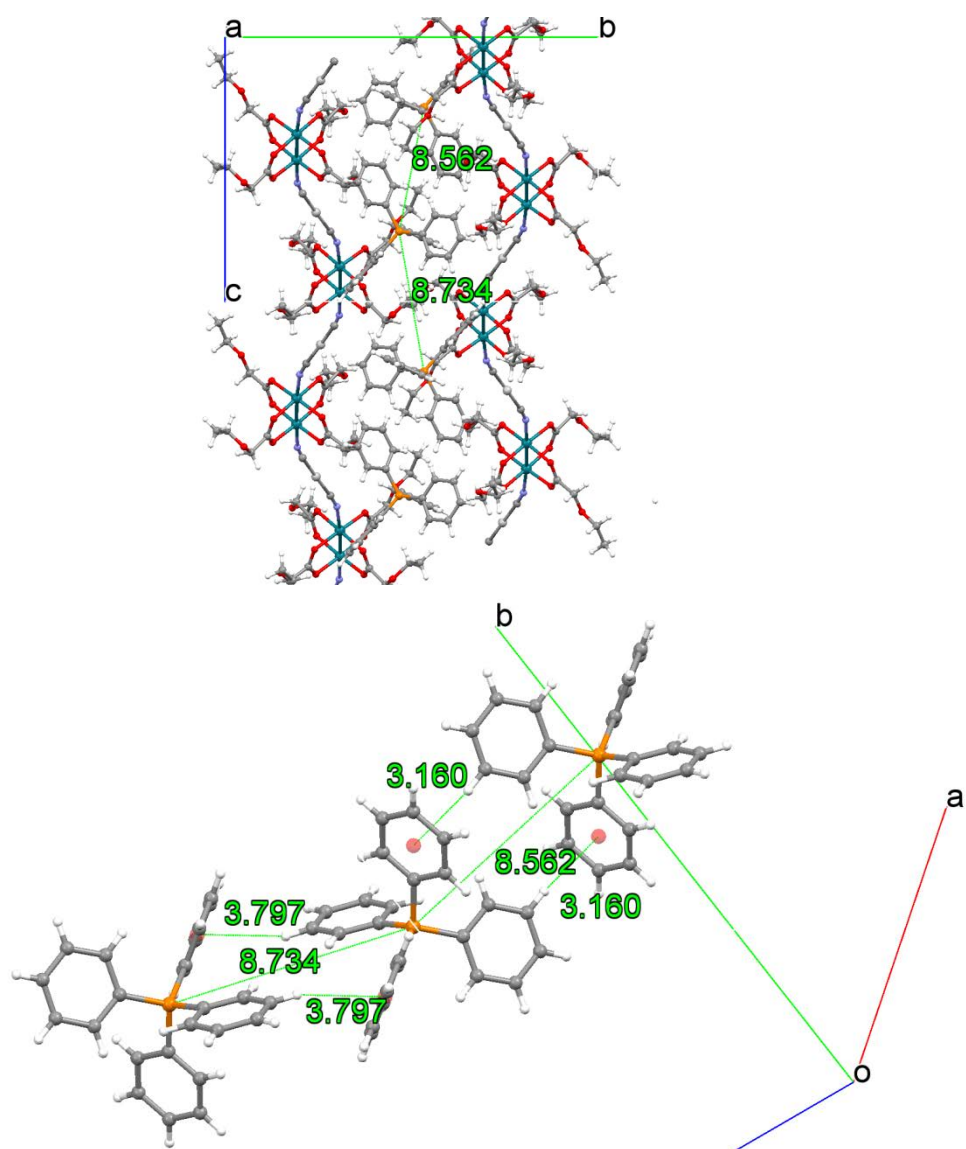

**Figure S12.** Interactions found between the closest  $(\text{PPh}_4)^+$  cations in the structure of 5.

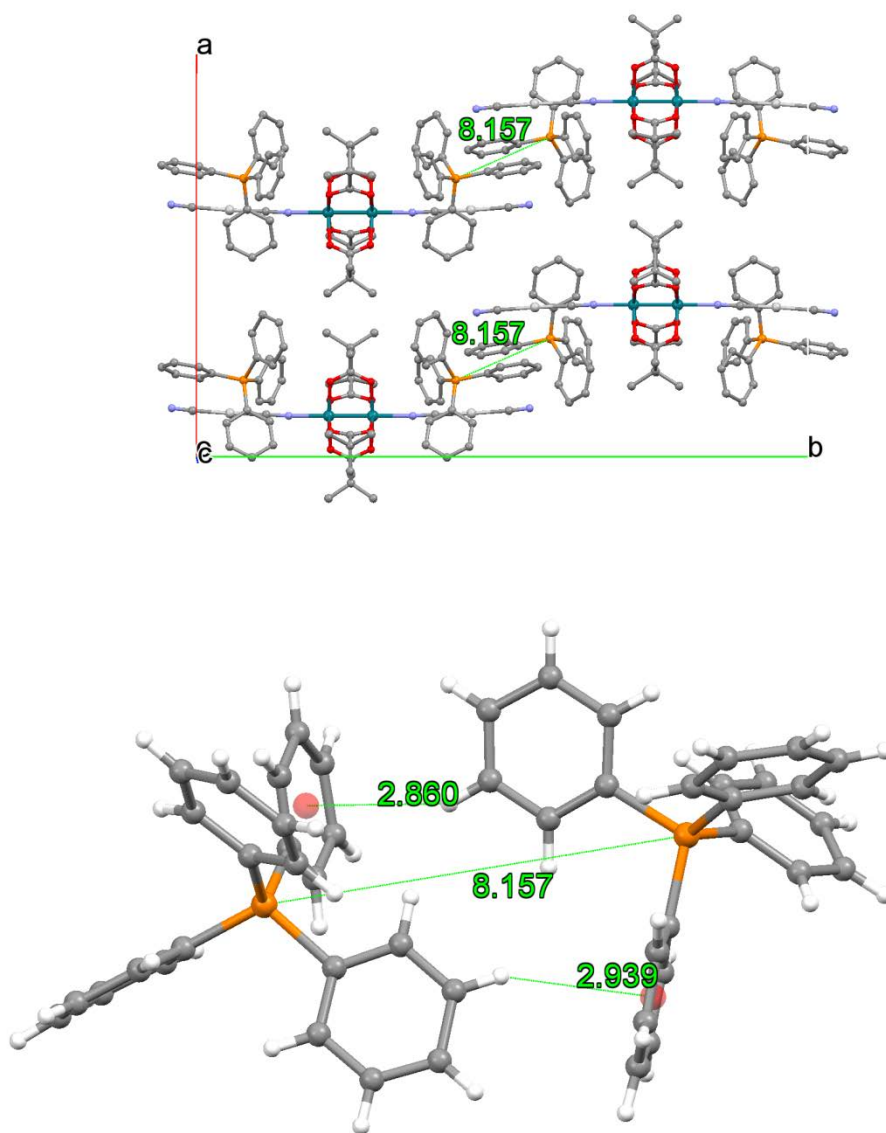

**Figure S13.** Representation of the structure of **6** along the *c* axis (top) and view of the interactions between the closest (PPh<sub>4</sub>)<sup>+</sup> cations (bottom).

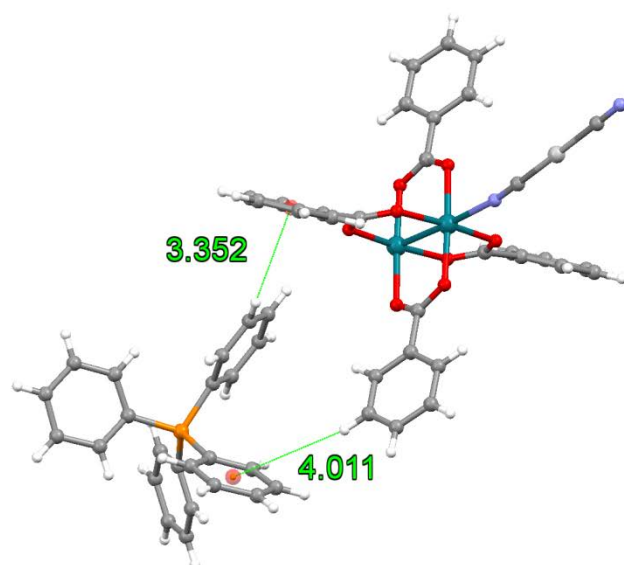

**Figure S14.** Interactions found between the closest cations and anionic chains in the structure of **4** .
